## RESEARCH ARTICLE

# Association of ideal cardiovascular health metrics with incident low estimated glomerular filtration rate: More than a decade follow-up in the Tehran Lipid and Glucose Study (TLGS)

Fatemeh Alizadeh<sup>1</sup>, Maryam Tohidi<sup>1\*</sup>, Mitra Hashemina<sup>1</sup>, Firoozeh Hosseini-Esfahani<sup>2</sup>, Fereidoun Azizi<sup>3</sup>, Farzad Hadaegh<sup>1</sup>

**1** Prevention of Metabolic Disorders Research Center, Research Institute for Endocrine Sciences, Shahid Beheshti University of Medical Sciences, Tehran, Iran, **2** Nutrition and Endocrine Research Center, Research Institute for Endocrine Sciences, Shahid Beheshti University of Medical Sciences, Tehran, Iran, **3** Endocrine Research Center, Research Institute for Endocrine Sciences, Shahid Beheshti University of Medical Sciences, Tehran, Iran

\* [tohidi@endocrine.ac.ir](mailto:tohidi@endocrine.ac.ir)

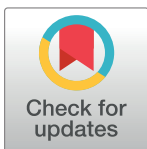

## OPEN ACCESS

**Citation:** Alizadeh F, Tohidi M, Hashemina M, Hosseini-Esfahani F, Azizi F, Hadaegh F (2024) Association of ideal cardiovascular health metrics with incident low estimated glomerular filtration rate: More than a decade follow-up in the Tehran Lipid and Glucose Study (TLGS). PLoS ONE 19(2): e0282773. <https://doi.org/10.1371/journal.pone.0282773>

**Editor:** Ferdinando Carlo Sasso, University of Campania Luigi Vanvitelli: Universita degli Studi della Campania Luigi Vanvitelli, ITALY

**Received:** June 18, 2022

**Accepted:** February 18, 2023

**Published:** February 1, 2024

**Peer Review History:** PLOS recognizes the benefits of transparency in the peer review process; therefore, we enable the publication of all of the content of peer review and author responses alongside final, published articles. The editorial history of this article is available here: <https://doi.org/10.1371/journal.pone.0282773>

**Copyright:** © 2024 Alizadeh et al. This is an open access article distributed under the terms of the [Creative Commons Attribution License](https://creativecommons.org/licenses/by/4.0/), which permits unrestricted use, distribution, and reproduction in any medium, provided the original author and source are credited.

## Abstract

### Aims

To evaluate the association between ideal cardiovascular health metrics (ICVHM) and incident low estimated glomerular filtration rate (eGFR) among the Iranian population.

### Methods

The study population included 6927 Iranian adults aged 20–65 years (2942 male) without prevalent low eGFR [i.e., eGFR < 60 ml/min/1.73 m<sup>2</sup>] and free of cardiovascular disease. The ICVHM was defined according to the 2010 American Heart Association. The multivariable Cox proportional hazards regression analysis was used to calculate the hazard ratios (HRs) of ICVHM both as continuous and categorical variables.

### Results

Over the median of 12.1 years of follow-up, we found 1259 incident cases of low eGFR among the study population. In this population, ideal and intermediate categories of body mass index (BMI) and blood pressure (BP) and only the ideal category of fasting plasma glucose (FPG) significantly decreased the risk of developing low eGFR; the corresponding HRs and (95% confidence intervals) were (0.87, 0.77–0.99), (0.84, 0.76–0.99), (0.79, 0.68–0.93), (0.70, 0.60–0.83) and (0.76, 0.64–0.91). Also, one additional ICVHM was associated with a reduced risk of low eGFR for the global (0.92, 0.88–0.97) and biological cardiovascular health (0.88, 0.82–0.93) in these participants. A sensitivity analysis using the interval-censoring approach demonstrated that our method is robust, and results remained essentially unchanged. In a subgroup population with dietary data (n = 2285), we did not find the

**Data Availability Statement:** The data underlying the results presented in the study are available from SBMU Research Institute for Endocrine Sciences. Furthermore, we uploaded an Excel file containing all data of this study as a “[Supporting Information](#) data file”.

**Funding:** This study was supported by Grant No. 121 and No. 30382 from the National Research Council of the Islamic Republic of Iran and Shahid Beheshti University of Medical Sciences. The funders had no role in study design, data collection and analysis, decision to publish, or preparation of the manuscript.

**Competing interests:** The authors have declared that no competing interests exist.

beneficial impact of having intermediate/ideal categories of nutrition status compared to its poor one on incident low eGFR.

## Conclusion

We found a strong inverse association between having higher global ICVHM with incident low eGFR among the non-elderly Iranian population; the issue is mainly attributable to normal BP, BMI, and FPG levels.

## Introduction

The prevalence of non-communicable diseases (NCDs), mainly cardiovascular diseases (CVD), cancers, hypertension, and diabetes, has been rising continuously over the past decades. NCDs, also known as chronic diseases, tend to be of long duration and are the result of a combination of genetic, physiological, environmental and behavioral factors [1], mainly due to the enhancement of technology, improvement of life expectancy, and the aging trend of the population [2, 3]. In 2016, it was estimated that NCDs were the leading cause of death, comprising more than 70% of total global mortality [4]. Among NCDs, chronic kidney disease (CKD) is a prevalent disease associated with CVD. The prevalence of CKD has been estimated to be approximately 8 to 16% globally and has continuously increased in the past few years [5, 6]. In Iran, based on the meta-analysis conducted in 2018, the prevalence of CKD was approximately 15.14% [7]. Moreover, more than 2% of Tehranian adults each year develop CKD [8]. Hosseinpanah et al. reported the prevalence of CKD to be more than 45% in Tehranian people over 60 years of age [9].

Diabetes mellitus (DM), high blood pressure (BP), hypercholesterolemia, high body mass index (BMI), and smoking are common risk factors for CKD and CVD [10]. Common pathophysiology of cardiovascular and renal diseases suggests that preventing and properly managing cardiovascular risk factors may also effectively prevent CKD [11]. In 2010, American Heart Association (AHA) established an initiative called Life’s Simple 7 to improve cardiovascular health among the American population. It is comprised of seven common risk factors for CVDs, including; smoking, BMI, physical activity (PA), diet, BP, total cholesterol (TC), and fasting plasma glucose (FPG). Since then, several studies have shown that achieving more ideal cardiovascular health metrics (ICVHM) are also associated with a lower incidence of type 2 DM (T2DM) and CVD and better cognitive function and quality of life [12–18]. Only a limited number of studies conducted among the adult population of the United States and in the East Asian population evaluated the association between ICVHM and the incidence of CKD and reported that higher ICVHM significantly reduced the risk of CKD and end-stage renal disease (ESRD) [11, 19, 20].

According to the national data, the prevalence of ICVHM remained very low from 2007–2016, and in the last survey, less than 4% of Iranian adults met  $\geq 6$  criteria of ICVHM. Although the smoking, BP status, and TC level had improved slightly, the unfavorable trends of PA, unhealthy diet, obesity, and dysglycemia were reported [21]. In the current study, for the first time, we examined the association of ICVHM and incident low estimated glomerular filtration rate (eGFR), i.e., less than  $< 60$  ml/min/1.73 m<sup>2</sup> in a large population-based study conducted in the Middle East and North Africa (MENA), a region with a high burden of CVD risk factors [22] during more than 12 years of follow-up.

## Methods

### Study population

The ethics statement was issued by Shahid Beheshti Medical University with approval number: IR.SBMU.ENDOCRINE.REC.1400.139. The consent was obtained both written and oral from each participant.

The Tehran Lipid and Glucose Study (TLGS) is a prospective longitudinal cohort study that was started in 1999 in Tehran, the most populated city in Iran. The purpose of this study was to evaluate the prevalence and incidence of NCDs and their risk factors and to promote healthier lifestyles through education. The study population was selected through random multi-stage cluster sampling, and the time interval between follow-up visits was about three years. (phase 1: 1999–2002, phase 2: 2002–2005, phase 3: 2005–2008, phase 4: 2008–2011, phase 5: 2011–2014, phase 6: 2014–2018, phase 7: 2018–2021) Detailed information regarding the TLGS is available elsewhere (trial registration number: ISRCTN52588395) [23–25].

In the current study, 8624 subjects 20–65 years old who participated in the TLGS from 2005 to 2008 were enrolled. After excluding those with baseline eGFR of less than 60 ml/min per 1.73 m<sup>2</sup> (n = 356), history of CVD (n = 402), missing data (n = 548), or those without any follow-up after baseline enrollment (n = 391), 6927 subjects who followed till February 2021 remained for the analyses. Of these participants, 2419 individuals had dietary data. After excluding subjects with under- and over-reporting of energy intake (< 800 or ≥ 4200 Kcal/day), 2285 individuals remained for subgroup analysis (Fig 1).

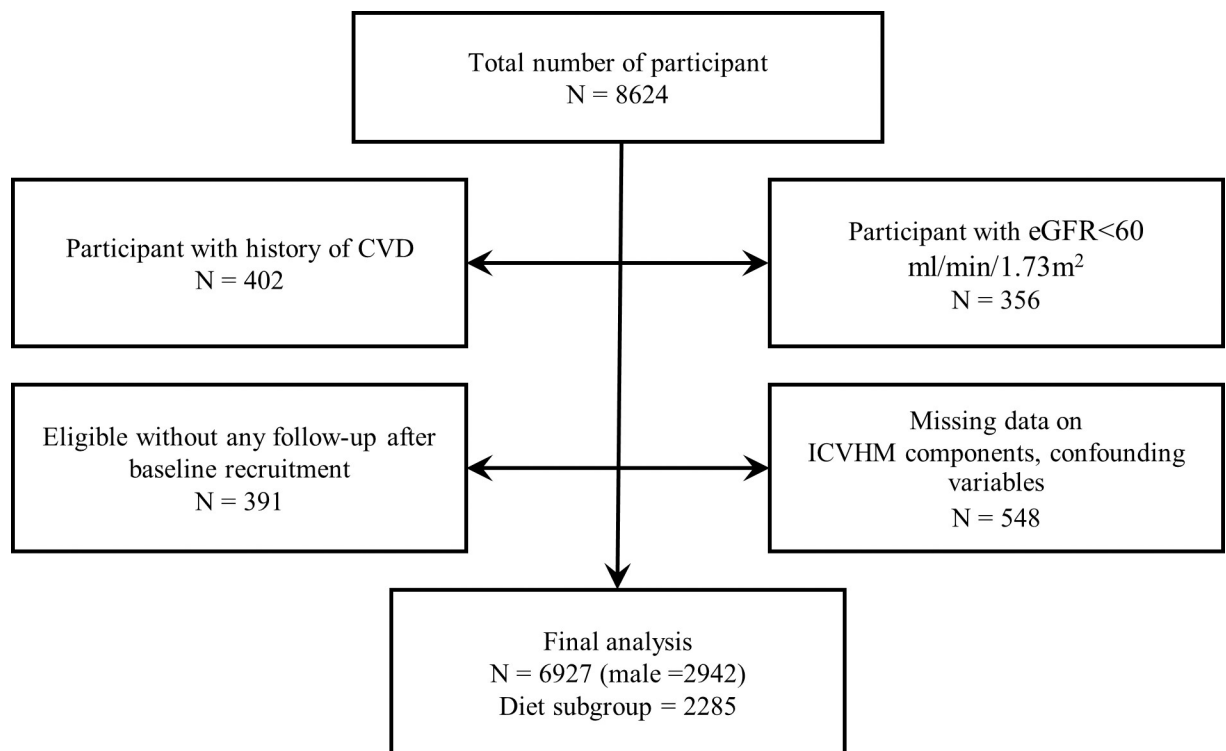

**Fig 1. Flow chart of study population.** CVD, cardiovascular disease; eGFR, estimated glomerular filtration rate; ICVHM ideal cardiovascular health metrics.

<https://doi.org/10.1371/journal.pone.0282773.g001>

## Clinical and laboratory measurements

A standardized questionnaire was used to gather demographic data and relevant information, such as the history of smoking, medications, and CVD. Also, the modifiable activity questionnaire (MAQ) [26] and food frequency questionnaire (FFQ) [27, 28] were also set for gathering data regarding PA and nutrition, respectively. The Persian version of MAQ and FFQ was validated in previous studies [26, 28, 29].

A trained nurse performed the anthropometric examinations. Weight was measured with minimal clothing using a calibrated digital weighing scale with an accuracy of 100 grams (Seca 707, range 0.1–150 kg; Hanover, MD, USA). Height was measured in a normal upright position with shoulders at rest and without shoes. BMI was calculated by dividing weight by the square of height ( $\text{kg}/\text{m}^2$ ). Twice measurements of systolic and diastolic blood pressures (SBP and DBP, respectively) were done by a calibrated sphygmomanometer for each participant after 15 minutes of rest by a trained physician and the averages of those measurements were recorded as BP. Further information is available elsewhere [23, 24].

To gather dietary data, we used a valid and reliable 168-item semi-quantitative FFQ to assess usual dietary intakes over 12 months before the follow-up examination [27, 28]. The consumption frequencies of each food item were converted to daily intakes (in grams) and then were changed to servings per day.

The participants were referred to the laboratory between 7 to 9 AM after 12 to 14 hours of fasting for blood sampling. Samples were centrifuged for 30–45 minutes, and plasma and serum samples were extracted according to the standard protocols. FPG, TC, and creatinine measurements were performed on the same day of blood collection. FPG and serum TC were measured using enzymatic colorimetric methods with glucose oxidase, and cholesterol oxidase and cholesterol esterase, respectively. Serum creatinine (cr) levels were assayed by the kinetic colorimetric Jaffe method with an assay sensitivity of 0.2 mg/dL. All biochemical assays were performed using commercial kits (Pars Azmoon Inc., Tehran, Iran) by a Selectra 2 auto-analyzer (Vital Scientific, Spankeren, The Netherlands). Assay quality was monitored after every 25 tests using lyophilized serum controls in normal and different abnormal concentrations. Intra- and inter-assay coefficients of variations are 2.2% and 2.2% for serum glucose, 2.0 and 0.5% for TC, and 1.2 and 2.6% for creatinine, respectively. The CKD Epidemiology Collaboration (CKD-EPI) formula  $\text{eGFR} = 141 \times \min(\text{Scr}/\kappa, 1)^{\alpha} \times \max(\text{Scr}/\kappa, 1)^{-1.209} \times 0.993^{\text{Age}} \times 1.018[\text{if female}] \times 1.159[\text{if black}]$  was used to estimate eGFR [23, 24]. Since the CKD-EPI equation is expressed only for standardized creatinine values, we reduced the creatinine levels by 5% [30].

## Definitions

We used the AHA 2020 criteria, including ideal, intermediate, and poor status for ICVHM. Behavioral factors include PA, smoking and dietary intake. According to data derived from MAQ, the extent of PA was classified as 1) strenuous activity as more than 1500 metabolic equivalent of task (METs) minutes per week, 2) moderate activity as between 600 to 1500 METs minutes per week, and 3) mild activity as less than 600 METs minutes per week. To match the smoking status to ICVHM, three categories were defined: 1) ideal state that includes never smokers 2) intermediate state that includes former smokers, persons who smoked previously up to one year ago, and 3) poor state that consists of current smokers, persons who currently smoke cigarettes, hookah, or pipe. To define the ideal cardiovascular health profile regarding dietary habits, the diet was classified into five items: fruit and vegetable intake of  $\geq 4/5$  cup per day, eating seafood  $\geq 3.5$ -ounce serving twice per week, eating three ounces of whole grain per day, sodium consumption of less than 1.5 gram per day, and drinking less

than 36 ounces of sugar-sweetened drinks per week. Subsequently, the participant's dietary status was categorized into 1) ideal (5–6 items), 2) moderate (2–4 items), and 3) poor (0–1 item). BMI  $\leq 25$  kg/m<sup>2</sup>, between 25 to 29.9 kg/m<sup>2</sup>, and  $\geq 30$  kg/m<sup>2</sup> were considered as ideal, intermediate, and poor categories, respectively.

Biological factors include BP status and FPG and TC levels. Ideal, intermediate, and poor BP status was defined as SBP/DBP  $\leq 120/80$  mm/Hg, 120/80 to 139/89 or taking medication, and  $\geq 140/90$ , respectively. Three ranges of FPG as FPG  $\leq 100$  mg/dL, between 100 to 125 mg/dL or treated, and  $\geq 126$  mg/dL were considered as ideal, intermediate, and poor status. Regarding TC, TC levels  $\leq 200$  mg/dL, between 200 to 239 mg/dL or taking medication, and  $\geq 240$  mg/dL were defined as ideal, intermediate, and poor conditions, respectively.

ICVHM was calculated by summing the score of each of its six or seven ICVHM in total and subgroup populations, respectively. The sum of each metrics score would define the individual's total ICVHM score (ranging from 0 to 6). Total ICVHM scores  $< 2$  were considered poor, between 2 to 4 as intermediate, and  $\geq 5$  as the ideal ICVHM score.

### Statistical analysis

Continuous variables were expressed as mean  $\pm$  standard (SD) deviation or median [inter-quartile range (IQR)] and categorical variables as the frequency (%). The ANOVA, Kruskal-Wallis test, and the Chi-squared tests were used to compare continuous and categorical variables among ICVHM categories. Student t-test and Chi-squared tests were used to compare respondents with non-respondents [those with missing data at baseline, or without follow-up ( $n = 939$ )].

Due to lack of interaction between gender and all of the variables ( $P > 0.2$ ), we performed our analysis in a pooled population. The Multivariate Cox Proportional Hazard models were used to calculate the hazard ratios (HRs) of each of the ICVHM metrics for low eGFR, considering the poor status as the reference in model 1 adjusted for age and gender; model 2: model 1 plus educational level and marital status; and model 3: model 2 plus eGFR baseline. Time to event was defined as the time of censoring or date of incidence of low eGFR, whichever occurred first. The event date for the incident cases of low eGFR was defined as mid-time between the date of the follow-up visit at which the low eGFR was determined for the first time and the most recent follow-up visit before the diagnosis. For censored subjects, the time was the interval between the first and the last observation dates. Study participants who died, lost the follow-up, or did not have low eGFR until the end of the study were considered as censored subjects. The proportional hazards assumption in the Cox model was assessed with the Schoenfeld residual test and log-log survival plots. All P values for proportionality assumptions were  $> 0.1$  in different multivariable-adjusted models (S1 and S2 Tables in [S1 File](#)). As a sensitivity analysis, we re-run the analysis on a sub-population with available dietary data.

We performed several sensitivity analyses to test the robustness of our findings. First, to reduce selection bias [31], propensity score (PS), the estimated probability that a participant would have followed in the study, was computed using maximum likelihood logistic regression analysis among the study population. For this reason, the entire baseline measures, including age, sex, BMI, SBP, DBP, FPG, TC, eGFR, education level, PA, smoking, marital status, drug consumption for diabetes, lipid and hypertension, were included in a logistic model as exposures with participation in the follow-up as the outcome; the probability of participation in follow-up was then estimated for every participant. Hence we added PS to the Cox models as another covariate (S3-S5 Tables in [S1 File](#)). Second, we re-performed our data analyses using Cox regression analysis with interval-censoring (S6-S8 Tables in [S1 File](#)). Third, we treated covariates, including age and marital status as time-varying confounders in our data analysis (S9-S11 Tables in [S1 File](#)).

**Table 1. Baseline characteristics of the study participants by categories of global cardiovascular health status\* (n = 6927).**

| Variables                           | Global cardiovascular health status |                         |                  |
|-------------------------------------|-------------------------------------|-------------------------|------------------|
|                                     | Poor (n = 1370)                     | Intermediate (n = 3532) | Ideal (n = 2025) |
| <b>Continuous variables</b>         |                                     |                         |                  |
| Age (year)                          | 46.4 ± 10.3                         | 39.7 ± 11.3             | 31.8 ± 9.68      |
| BMI (kg/m <sup>2</sup> )            | 30.2 ± 4.43                         | 28.0 ± 4.40             | 23.9 ± 3.91      |
| SBP (mmHg)                          | 124 ± 15.7                          | 111 ± 14.5              | 102 ± 10.3       |
| DBP (mmHg)                          | 81.0 ± 9.35                         | 73.5 ± 9.53             | 66.6 ± 7.77      |
| FPG (mmol/L)                        | 5.55 (4.88–6.33)                    | 4.88 (4.61–5.21)        | 4.66 (4.44–4.94) |
| TC (mmol/L)                         | 5.62 ± 0.98                         | 4.88 ± 0.95             | 4.21 ± 0.66      |
| eGFR (ml/min/1.73 m <sup>2</sup> )  | 80.8 ± 13.0                         | 84.2 ± 13.1             | 89.2 ± 13.6      |
| <b>Categorical variables</b>        |                                     |                         |                  |
| Gender (male)                       | 767 (26.1)                          | 1573 (53.5)             | 602 (20.5)       |
| Educational level (year)            |                                     |                         |                  |
| < 6                                 | 392 (34.4)                          | 623 (54.7)              | 124 (10.9)       |
| 6–12                                | 733 (17.3)                          | 2147 (50.8)             | 1350 (31.9)      |
| > 12                                | 245 (15.7)                          | 762 (48.9)              | 551 (35.4)       |
| Physical activity (METs)            |                                     |                         |                  |
| < 600                               | 714 (27.8)                          | 1367 (53.3)             | 486 (18.9)       |
| 600–1500                            | 396 (26.1)                          | 838 (55.3)              | 282 (18.6)       |
| > 1500                              | 260 (9.1)                           | 1327 (46.7)             | 1257 (44.2)      |
| Smoking                             |                                     |                         |                  |
| Current                             | 306 (36.5)                          | 466 (55.6)              | 66 (7.9)         |
| Past                                | 249 (48.8)                          | 233 (45.7)              | 28 (5.5)         |
| Never                               | 815 (14.6)                          | 2833 (50.8)             | 1931 (34.6)      |
| Marital status                      |                                     |                         |                  |
| Married                             | 1200 (22.3)                         | 2824 (52.5)             | 1360 (25.3)      |
| Widowed + Divorced                  | 85 (32.1)                           | 139 (52.5)              | 41 (15.5)        |
| Single                              | 85 (6.7)                            | 569 (44.5)              | 624 (48.8)       |
| Glucose lowering drug use, yes (%)  | 279 (66.4)                          | 133 (31.7)              | 8 (1.9)          |
| Anti-hypertensive drug use, yes (%) | 87 (53.7)                           | 73 (45.1)               | 2 (1.2)          |
| Lipid-lowering drug use, yes (%)    | 105 (54.4)                          | 87 (45.1)               | 1 (0.5)          |

Values are mean ± SD, median (inter-quartile rang), or n (%).

\* Defined according to the number of ideal cardiovascular health metrics: 0 to 1 (poor), 2 to 4 (intermediate), and 5 to 6 (ideal).

BMI, body mass index; SBP, systolic blood pressure; DBP, diastolic blood pressure; FPG, fasting plasma glucose; TC, total cholesterol; eGFR, estimated glomerular filtration rate; METs, metabolic equivalent of task.

<https://doi.org/10.1371/journal.pone.0282773.t001>

Statistical analyses were performed using IBM SPSS Statistics for Windows, Version 22 (IBM Corp), Stata Version 14.0 (StataCorp LLC, TX, USA) and R version 4.1.2. P-values ≤ 0.05 were considered statistically significant.

## Results

The total number of participants was 6927 (male = 2942). As shown in [Table 1](#), the mean ± SD values for age, BMI and eGFR were 38.7±11.8 years, 27.2±4.28 kg/m<sup>2</sup>, and 85.0±13.6 ml/min/1.73 m<sup>2</sup>, respectively. [S12 Table](#) in [S1 File](#) shows the baseline characteristics of the respondent and non-respondent individuals. Compared to the respondent, the non-respondent persons were younger and had a lower mean BMI and higher values of FPG and eGFR. They were more likely than respondent subjects to be smokers and single.



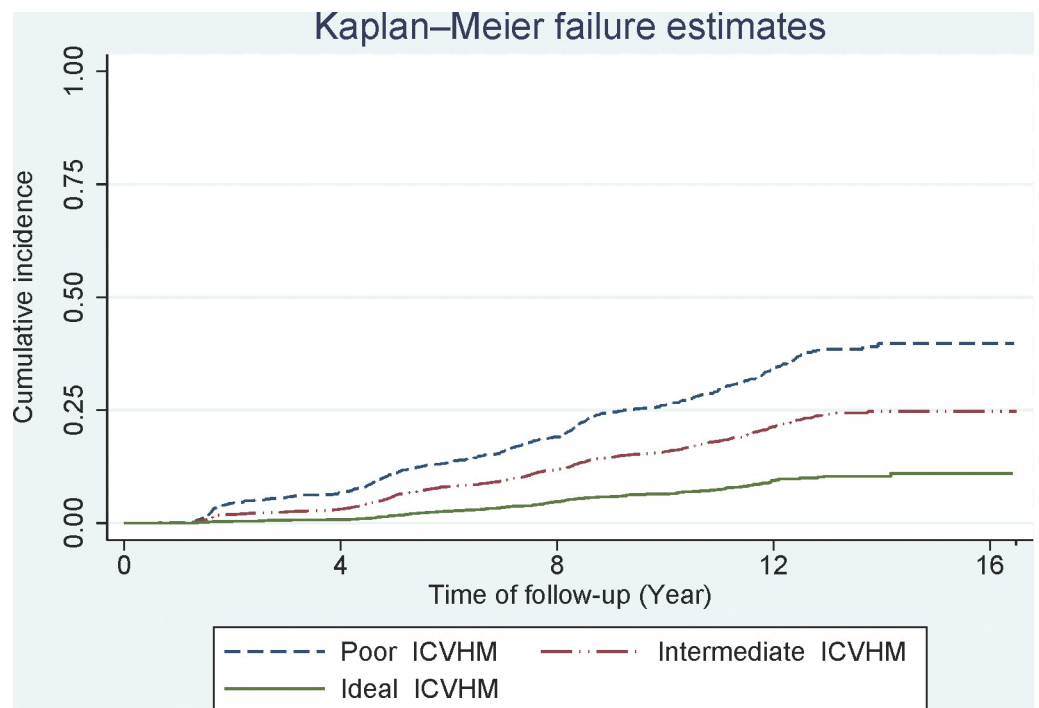

**Fig 2. Kaplan-Mayer curve for poor, intermediate and ideal categories of cardiovascular health and incident developing low estimated glomerular filtration rate.**

<https://doi.org/10.1371/journal.pone.0282773.g002>

The frequencies of different categories of ICVHM were 19.7, 51.0, and 29.3% for poor, intermediate, and ideal categories. There were statistically significant differences in the baseline characteristics between the three categories of ICVHM among participants.

During a median follow-up of 12.1 (9.7–13.2) years, we found 1259 incident cases of low eGFR among the participants. The Kaplan-Mayer curves of poor, intermediate and ideal categories of ICVHM for incident low eGFR are presented in Fig 2. The HRs and 95% confidence intervals (CIs) of intermediate and ideal categories for each ICVHM metric for incident low eGFR are shown in Table 2. According to the results, ideal and intermediate categories of BMI and BP and only the ideal category of FPG significantly decreased the risk of developing low eGFR; the corresponding values were (0.87, 0.77–0.99), (0.84, 0.76–0.99), (0.79, 0.68–0.93), (0.70, 0.60–0.83) and (0.76, 0.64–0.91) in model 3.

As shown in Table 3, one additional ICVHM was associated with (0.92, 0.88–0.97) and (0.88, 0.82–0.93) reduced risk of low eGFR for the global and biological cardiovascular health, respectively, in model 3.

The association between global cardiovascular health status and incident low eGFR is shown in Table 4; intermediate and ideal cardiovascular health categories were demonstrated (0.89, 0.78–1.01,  $p = 0.06$ ) and (0.71, 0.59–0.86) reduced risk of low eGFR, respectively in model 3. Age, female gender, and lower eGFR were significantly associated with an increased risk of developing low eGFR ( $< 60$  ml/min/1.73 m<sup>2</sup>).

Among 2285 individuals with dietary data, having intermediate/ideal categories of nutrition status compared to poor one was associated with lower risk of incident a low eGFR that did not get rich to the significant level (0.96, 0.88–1.04). Moreover, achieving higher ICVHM was not associated with incident low eGFR, whether as continuous or categorical variables, even in model 1 (S13–S15 Tables in S1 File).

**Table 2. HRs and 95% CIs of intermediate and ideal categories of each ICVHM for incident low eGFR.**

|                              | e/N       | Model 1<br>HR (95% CI)  | Model 2<br>HR (95% CI)   | Model 3<br>HR (95% CI)  |
|------------------------------|-----------|-------------------------|--------------------------|-------------------------|
| <b>Smoking status</b>        |           |                         |                          |                         |
| Poor                         | 113/838   | 1                       | 1                        | 1                       |
| Intermediate                 | 89/510    | 0.88 (0.67–1.16)        | 0.88 (0.67–1.17)         | 0.87 (0.66–1.15)        |
| Ideal                        | 1057/5579 | 0.95 (0.77–1.17)        | 0.96 (0.78–1.18)         | 0.94 (0.76–1.16)        |
| <b>Body mass index</b>       |           |                         |                          |                         |
| Poor                         | 463/1732  | 1                       | 1                        | 1                       |
| Intermediate                 | 559/2883  | 0.91 (0.80–1.03)        | 0.80 (0.70–1.01)         | <b>0.87 (0.77–0.99)</b> |
| Ideal                        | 237/2312  | <b>0.84 (0.72–0.99)</b> | <b>0.83 (0.71–0.98)</b>  | <b>0.84 (0.71–0.99)</b> |
| <b>Physical activity</b>     |           |                         |                          |                         |
| Poor                         | 402/2567  | 1                       | 1                        | 1                       |
| Intermediate                 | 297/1516  | 1.01 (0.87–1.18)        | 1.00 (0.86–1.16)         | 1.03 (0.88–1.19)        |
| Ideal                        | 560/2844  | 1.04 (0.91–1.18)        | 1.03 (0.91–1.17)         | 1.04 (0.92–1.18)        |
| <b>Total cholesterol</b>     |           |                         |                          |                         |
| Poor                         | 207/644   | 1                       | 1                        | 1                       |
| Intermediate                 | 470/1778  | 0.99 (0.84–1.17)        | 0.98 (0.83–1.16)         | 0.98 (0.83–1.16)        |
| Ideal                        | 582/4505  | 0.86 (0.73–1.02)        | <b>0.85 (0.72–1.00)*</b> | 0.88 (0.74–1.03)        |
| <b>Blood pressure</b>        |           |                         |                          |                         |
| Poor                         | 236/620   | 1                       | 1                        | 1                       |
| Intermediate                 | 455/1975  | <b>0.79 (0.68–0.93)</b> | <b>0.79 (0.67–0.93)</b>  | <b>0.79 (0.68–0.93)</b> |
| Ideal                        | 568/4332  | <b>0.72 (0.61–0.84)</b> | <b>0.71 (0.60–0.84)</b>  | <b>0.70 (0.60–0.83)</b> |
| <b>Fasting blood glucose</b> |           |                         |                          |                         |
| Poor                         | 144/354   | 1                       | 1                        | 1                       |
| Intermediate                 | 232/761   | 0.96 (0.78–1.19)        | 0.95 (0.77–1.17)         | 0.84 (0.68–1.04)        |
| Ideal                        | 883/5812  | <b>0.83 (0.69–0.99)</b> | <b>0.82 (0.68–0.98)</b>  | <b>0.76 (0.64–0.91)</b> |

HR, hazard ratio; CI, confidence interval; ICVHM: ideal cardiovascular health metrics; eGFR: estimated glomerular filtration rate; e/N, number of low eGFR events /number of population at risk.

Model 1: adjusted for gender and age; Model 2: further adjusted for educational level and marital status; Model 3: further adjusted for eGFR.

Significant values are bold (P value < 0.05)

\*P value = 0.06

<https://doi.org/10.1371/journal.pone.0282773.t002>

We performed three sensitivity analyses. First, after further adjustment for PS, our results remained essentially unchanged, as shown in S3–S5 Tables in [S1 File](#). The PS was not associated with incident eGFR < 60 ml/min/1.73m<sup>2</sup> in different adjusted models, hence, the

**Table 3. Cox proportional hazard models of ICVH for incident low eGFR (per one additional metric).**

|                                  | Model 1<br>HR (95% CI)  | Model 2<br>HR (95% CI)  | Model 3<br>HR (95% CI)  |
|----------------------------------|-------------------------|-------------------------|-------------------------|
| Global cardiovascular health     | <b>0.93 (0.88–0.97)</b> | <b>0.92 (0.88–0.96)</b> | <b>0.92(0.88–0.97)</b>  |
| Behavioral cardiovascular health | 0.98 (0.91–1.06)        | 0.98 (0.91–1.06)        | 0.99(0.91–1.07)         |
| Biological cardiovascular health | <b>0.88 (0.82–0.93)</b> | <b>0.87 (0.82–0.93)</b> | <b>0.88 (0.82–0.93)</b> |

ICVH: ideal cardiovascular health; eGFR: estimated glomerular filtration rate; HR, hazard ratio; CI, confidence interval.

Model 1: adjusted for gender and age; Model 2: further adjusted for educational level and marital status; Model 3: further adjusted for eGFR.

<https://doi.org/10.1371/journal.pone.0282773.t003>



**Table 4. HRs and 95% CIs of different global cardiovascular health status † for incident low eGFR.**

|                              |                    | Model 1                 | Model 2                   | Model 3                  |
|------------------------------|--------------------|-------------------------|---------------------------|--------------------------|
|                              |                    | HR (95% CI)             | HR (95% CI)               | HR (95% CI)              |
| Global Cardiovascular health |                    |                         |                           |                          |
|                              | Poor               | 1                       | 1                         | 1                        |
|                              | Intermediate       | 0.90 (0.79–1.02)        | <b>0.89 (0.78–1.00) *</b> | <b>0.89 (0.78–1.01)*</b> |
|                              | Ideal              | <b>0.72 (0.59–0.87)</b> | <b>0.70 (0.57–0.85)</b>   | <b>0.71 (0.59–0.86)</b>  |
| Age, year                    |                    | <b>1.11 (1.10–1.12)</b> | <b>1.12 (1.11–1.128)</b>  | <b>1.08 (1.07–1.09)</b>  |
| Female (male as reference)   |                    | <b>1.92 (1.70–2.17)</b> | <b>2.07 (1.82–2.35)</b>   | <b>1.56 (1.37–1.78)</b>  |
| Educational level            |                    |                         |                           |                          |
|                              | > 12               | _____                   | 1                         | 1                        |
|                              | 6–12               | _____                   | 1.06 (0.88–1.26)          | 1.17 (0.98–1.40)         |
|                              | < 6                | _____                   | <b>0.80 (0.66–0.98)</b>   | 0.95 (0.78–1.16)         |
| Marital status               |                    |                         |                           |                          |
|                              | Married            | _____                   | 1                         | 1                        |
|                              | Divorced + Widowed | _____                   | 0.87 (0.71–1.06)          | 0.93 (0.76–1.14)         |
|                              | Single             | _____                   | 0.91 (0.66–1.26)          | 0.95 (0.69–1.32)         |
| eGFR                         |                    | _____                   | _____                     | <b>0.93 (0.93–0.94)</b>  |

HR, Hazard Ratio; CI, Confidence Intervals; eGFR, estimated glomerular filtration rate.

† Defined according to the number of ideal metrics: 0 to 1 (poor), 2 to 4 (intermediate), and 5 to 6 (ideal).

Model 1: adjusted for gender and age; Model 2: further adjusted for educational level marital status; Model 3: further adjusted for estimated glomerular filtration rate.

\* P = 0.06

<https://doi.org/10.1371/journal.pone.0282773.t004>

selection bias probably did not affect our estimations. Second, considering the interval-censoring approach, our results remained essentially unchanged, as demonstrated in S6–S8 Tables in [S1 File](#). Finally, treating age and marital status as time-varying confounders did not affect our estimates in the data analysis (S9–S11 Tables in [S1 File](#)).

## Discussion

This prospective cohort study evaluated the association between ICVHM and incident low eGFR in a long-term population-based study conducted in the MENA region. During a median follow-up of about 12 years among cardiovascular health metrics in non-elderly Tehranian participants, the intermediate and ideal categories of BMI and BP, and ideal category of FPG were associated with reduced risk of incident low eGFR. Moreover, we found that the risk of low eGFR decreased by 8% (HR: 0.92) for each additional global ICVHM after adjustment for age, gender, educational level, marital status, and eGFR. Being in the ideal category of global ICVHM was also associated with about 30% lower risk of incident low eGFR (HR: 0.71); moreover, a signal of lower risk was also found for intermediate ICVHM, as well.

To our knowledge, only three prospective studies conducted among the general population examined the association between ICVHM and kidney impairment [11, 19, 20]. Comparing our findings with these studies is difficult due to differences in categories of ICVHM, the level of confounder adjustment, duration of follow-up, and definition of CKD event. Rebholz et al. in the context of the ARIC study, found in 14832 subjects with a mean (SD) age of 54.7 (5.5) years, compared to 0 ideal health factors, having five or  $\geq 6$  health factors were associated with 73% and 81% lower risk of CKD. [11] Hou et al. in China found that among all age groups (< 40, 40–59, and  $\geq 60$  years), each one score increase in ICVHM per year was associated

with 11% (0.89, 0.87–0.91) reduction of CKD risk; however, the authors did not consider eGFR as an important confounder in their analysis [11, 19, 20]. Another study assessed the association of ICVHM and ESRD; it showed a graded association between a higher score of ICVHM and a lower incidence rate of ESRD, as those with 4 ICVHM had about 50% lower risk for the event compared to the reference category. However, this association was no longer significant after adjusting for eGFR, while our significant HRs persisted [11, 19, 20].

Almost all of the components of ICVHM have associated with CKD development. Individual-level data analysis conducted on 34 multinational cohorts from the CKD Prognosis Consortium, including 5 222 711 subjects from 28 countries, indicated that among diabetic and non-diabetic individuals, hypertension, having higher BMI, and ever smoker were significant predictors of CKD development [32]. Similar to our study, previous studies have also found that being in the healthier categories of BMI, BP and FPG was associated with a lower risk of CKD [11, 19, 20]. The results derived from the ARIC study showed that being in the intermediate and ideal categories of BMI was associated with 20% and 26% reduced risk of CKD, respectively. The corresponding values for BP were 27% and 50%, and for FPG, were 60% and 63% [11, 19, 20]. Contrary to our results, Hou et al. and Rebholz et al. found significant associations between smoking and low PA with an increased risk of developing CKD [11, 19]. In the current study, through different components of ICVHM, we did not find the harmful risk of smoking and low PA on incident low eGFR. A recent meta-analysis of prospective cohort studies showed that being a current smoker was associated with about 27% higher risk of incident CKD; however, there was significant heterogeneity between included studies ( $I^2 \approx 80\%$ ) [33, 34]. Regarding the relationship of PA on incident CKD, a meta-analysis by Zhu et al. found that the highest vs. the lowest PA level was associated with reduced odds of CKD with high heterogeneity between the included studies ( $I^2 \approx 84\%$ ). Furthermore, the authors also demonstrated that every 10 MET h/week increment of PA was associated with a reduction of 2% in CKD risk [35].

In a subgroup population with dietary data, we did not find the beneficial impact of having intermediate/ideal categories of nutrition status compared to its poor one on incident low eGFR. In the Chinese population, there were associations between worse ICVHM and ESRD, CKD and diabetes incidence; however, in these studies, only the information on salt intake was used, and there was no detailed information on dietary habits [19, 36, 37]. Previous studies on the TLGS population showed that diabetes risk reduction score which was based on eight dietary components (cereal fiber, nuts, coffee, polyunsaturated fat to saturated fat ratio, glycemic index, sugar-sweetened beverages, trans fatty acids, red and processed meat) was associated with 33% less likely to have CKD in the highest versus the lowest quartile of this score [38]. A dietary approach to stop hypertension diet and the Mediterranean diet (rich in whole grain, fruit and vegetables) have been found to reduce CKD risk by 59 and 47%, respectively [39]. Consumption of sugar-sweetened beverages  $\geq 4$  servings/week has been reported to increase the risk of CKD, compared to 0.5 servings/week [40]. High dietary sodium (7.84 gr) increased the risk of CKD incidence by 64% due to harmful effects on renal function [41]. Regarding the above-mentioned issues, it is better to score indices based on the recommended amounts of local food groups than the amounts based on different populations to estimate the risk of CKD effectively.

As strength, the present study was conducted in the context of the largest population based cohort study of the MENA region with a high burden of CKD. In this study, the association between ICVHM and the risk of incident low eGFR was assessed using both continuous and categorical approaches. Moreover, we also considered eGFR as an important confounder/mediator in our data analysis.

There are some limitations in our study. First; although the most epidemiological and interventional studies on CKD use single serum creatinine measurement, we considered low eGFR as the outcome instead of CKD due to lacking data on proteinuria. Second, we defined the outcome based on a single GFR estimation which has a high degree of intra-individual variability. However, consecutive GFR estimations would not extenuate the association of the predictors with the outcome. Third, we did not calibrate our serum creatinine measurement to the Cleveland Clinic, nor did we validate the eGFR formula (CKD-EPI) in a local population. This could also affect the incidence of low eGFR. Forth, diet information was not available for all participants; however, sensitivity analysis showed that dietary habits were not significantly associated with the risk of incident low eGFR. Fifth, some medications, such as Ibesartan, has some favorable impact in the course of renal failure among normotensive T2DM patients and reduced albumin excretion rate [42]; however, in our study out of 162 hypertension medication user, only 82 individuals were on Angiotensin receptor blockers. Moreover, this medication entered Iranian pharmacopeia in 2019.

## Conclusion

Based on the findings of this study, the ICVHM score was associated with a reduced risk of developing low eGFR in the middle-aged population during more than a decade follow-up. Among the various components of ICVHM, being in the ideal categories of BMI, FPG, and BP had a significant protective role against low eGFR incidence. Attainment of ideal cardiovascular health may potentially have substantial benefits for preventing CKD among the non-elder Iranian population.

## Supporting information

### S1 File.

(DOCX)

### S1 Data.

(XLSX)

## Acknowledgments

The authors wish to thank the study participants and the TLGS research team for their passionate support. This article has been extracted from the fellowship thesis of Dr Fatemeh Alizadeh.

## Author Contributions

**Conceptualization:** Maryam Tohidi, Fereidoun Azizi, Farzad Hadaegh.

**Formal analysis:** Mitra Hashemini, Firoozeh Hosseini-Esfahani.

**Methodology:** Fatemeh Alizadeh, Maryam Tohidi, Farzad Hadaegh.

**Supervision:** Maryam Tohidi, Fereidoun Azizi, Farzad Hadaegh.

**Writing – original draft:** Fatemeh Alizadeh.

**Writing – review & editing:** Fatemeh Alizadeh, Maryam Tohidi, Firoozeh Hosseini-Esfahani, Farzad Hadaegh.

## References

1. Razzaghi H, Martin DN, Quesnel-Crooks S, Hong Y, Gregg E, Andall-Brereton G, et al. 10-year trends in noncommunicable disease mortality in the Caribbean region. *Rev Panam Salud Publica*. 2019; 43:e37. Epub 2019/05/17. <https://doi.org/10.26633/RPSP.2019.37> PMID: 31093261; PubMed Central PMCID: PMC6438409.
2. Ho JY, Hendi AS. Recent trends in life expectancy across high income countries: retrospective observational study. *Bmj*. 2018; 362:k2562. Epub 2018/08/17. <https://doi.org/10.1136/bmj.k2562> PMID: 30111634; PubMed Central PMCID: PMC6092679.
3. Meyer AC, Drefahl S, Ahlbom A, Lambe M, Modig K. Trends in life expectancy: did the gap between the healthy and the ill widen or close? *BMC Med*. 2020; 18(1):41. Epub 2020/03/21. <https://doi.org/10.1186/s12916-020-01514-z> PMID: 32192480; PubMed Central PMCID: PMC7082956.
4. Bennett JE, Stevens GA, Mathers CD, Bonita R, Rehm J, Kruk ME, et al. NCD Countdown 2030: worldwide trends in non-communicable disease mortality and progress towards Sustainable Development Goal target 3.4. *The Lancet*. 2018; 392(10152):1072–88. [https://doi.org/10.1016/S0140-6736\(18\)31992-5](https://doi.org/10.1016/S0140-6736(18)31992-5) PMID: 30264707
5. Levey A, Atkins R, Coresh J, Cohen E, Collins A, Eckardt K-U, et al. Chronic kidney disease as a global public health problem: approaches and initiatives—a position statement from Kidney Disease Improving Global Outcomes. *Kidney international*. 2007; 72(3):247–59. <https://doi.org/10.1038/sj.ki.5002343> PMID: 17568785
6. Obrador GT, Mahdavi-Mazdeh M, Collins AJ, Network GKDP. Establishing the global kidney disease prevention network (KDPN): a position statement from the National Kidney Foundation. *American Journal of Kidney Diseases*. 2011; 57(3):361–70. <https://doi.org/10.1053/j.ajkd.2010.12.006> PMID: 21335246
7. Bouya S, Balouchi A, Rafiemanesh H, Hesaraki M. Prevalence of Chronic Kidney Disease in Iranian General Population: A Meta-Analysis and Systematic Review. *Ther Apher Dial*. 2018; 22(6):594–9. Epub 2018/07/06. <https://doi.org/10.1111/1744-9987.12716> PMID: 29974630.
8. Tohidi M, Hasheminia M, Mohebi R, Khalili D, Hosseinpanah F, Yazdani B, et al. Incidence of chronic kidney disease and its risk factors, results of over 10 year follow up in an Iranian cohort. *PloS one*. 2012. <https://doi.org/10.1371/journal.pone.0045304> PMID: 23028919
9. Hosseinpanah F, Kasraei F, Nassiri AA, Azizi F. High prevalence of chronic kidney disease in Iran: a large population-based study. *BMC public Health*. 2009; 9(1):1–8. <https://doi.org/10.1186/1471-2458-9-44> PMID: 19183493
10. Michishita R, Matsuda T, Kawakami S, Tanaka S, Kiyonaga A, Tanaka H, et al. Hypertension and hyperglycemia and the combination thereof enhances the incidence of chronic kidney disease (CKD) in middle-aged and older males. *Clinical and Experimental Hypertension*. 2017; 39(7):645–54. <https://doi.org/10.1080/10641963.2017.1306541> PMID: 28590145
11. Rebholz CM, Anderson CAM, Grams ME, Bazzano LA, Crews DC, Chang AR, et al. Relationship of the American Heart Association's Impact Goals (Life's Simple 7) With Risk of Chronic Kidney Disease: Results From the Atherosclerosis Risk in Communities (ARIC) Cohort Study. *Journal of the American Heart Association*. 2016; 5(4):e003192. <https://doi.org/10.1161/JAHA.116.003192> PMID: 27053058
12. Fretts AM, Howard BV, McKnight B, Duncan GE, Beresford SA, Mete M, et al. Life's Simple 7 and incidence of diabetes among American Indians: the Strong Heart Family Study. *Diabetes Care*. 2014; 37(8):2240–5. Epub 2014/05/09. <https://doi.org/10.2337/dc13-2267> PMID: 24804696; PubMed Central PMCID: PMC4113167.
13. Kronish IM, Carson AP, Davidson KW, Muntner P, Safford MM. Depressive symptoms and cardiovascular health by the American Heart Association's definition in the Reasons for Geographic and Racial Differences in Stroke (REGARDS) study. *PLoS One*. 2012; 7(12):e52771. Epub 2013/01/10. <https://doi.org/10.1371/journal.pone.0052771> PMID: 23300767; PubMed Central PMCID: PMC3530476.
14. Kulshreshtha A, Vaccarino V, Judd SE, Howard VJ, McClellan WM, Muntner P, et al. Life's Simple 7 and risk of incident stroke: the reasons for geographic and racial differences in stroke study. *Stroke*. 2013; 44(7):1909–14. Epub 2013/06/08. <https://doi.org/10.1161/STROKEAHA.111.000352> PMID: 23743971; PubMed Central PMCID: PMC3816734.
15. Thacker EL, Gillett SR, Wadley VG, Unverzagt FW, Judd SE, McClure LA, et al. The American Heart Association Life's Simple 7 and incident cognitive impairment: The REasons for Geographic And Racial Differences in Stroke (REGARDS) study. *J Am Heart Assoc*. 2014; 3(3):e000635. Epub 2014/06/13. <https://doi.org/10.1161/JAHA.113.000635> PMID: 24919926; PubMed Central PMCID: PMC4309046.
16. Asgari S, Masrouei S, Hosseinpour S, Moslehi N, Azizi F, Hadaegh F. The Association of Ideal Cardiovascular Health Metrics and Incident Type 2 Diabetes Mellitus Among an urban population of Iran: a decade follow-up in Tehran Lipid and Glucose Study. *Journal of Diabetes Investigation*. 2022.

17. Gæde P, Vedel P, Larsen N, Jensen GV, Parving H-H, Pedersen O. Multifactorial intervention and cardiovascular disease in patients with type 2 diabetes. *New England Journal of Medicine*. 2003; 348(5):383–93. <https://doi.org/10.1056/NEJMoa021778> PMID: 12556541
18. Sasso F, Pafundi P, Simeon V, De Nicola L, Chiodini P, Galiero R, et al. NID-2 Study Group Investigators et al. Efficacy and durability of multifactorial intervention on mortality and MACEs: A randomized clinical trial in type-2 diabetic kidney disease. *Cardiovasc Diabetol*. 2021; 20:145. <https://doi.org/10.1186/s12933-021-01343-1> PMID: 34271948
19. Hou J, Li J, Huang J, Lu C, Zhou J, Liu Y, et al. Relationship between the exposure to cumulative cardiovascular health behaviors and factors and chronic kidney disease-The Kailuan study. *PLoS One*. 2018; 13(8):e0203171. Epub 2018/09/01. <https://doi.org/10.1371/journal.pone.0203171> PMID: 30169509; PubMed Central PMCID: PMC6118362.
20. Muntner P, Judd SE, Gao L, Gutiérrez OM, Rizk DV, McClellan W, et al. Cardiovascular risk factors in CKD associate with both ESRD and mortality. *J Am Soc Nephrol*. 2013; 24(7):1159–65. Epub 2013/05/25. <https://doi.org/10.1681/ASN.2012070642> PMID: 23704285; PubMed Central PMCID: PMC3699822.
21. Rahmani F, Asgari S, Khalili D, Habibi Moeini AS, Tohidi M, Azizi F, et al. National trends in cardiovascular health metrics among Iranian adults using results of three cross-sectional STEPwise approaches to surveillance surveys. *Scientific reports*. 2021; 11(1):1–11. <https://doi.org/10.1038/s41598-020-79322-x> PMID: 33420115
22. Tamehri Zadeh SS, Moazzeni SS, Matsushita K, Hashemina M, Azizi F, Hadaegh F. Application of the 2017 American college of cardiology/American Heart Association Blood Pressure Guidelines for cardiovascular outcomes among Tehranian residents. *Journal of hypertension*. 2022. <https://doi.org/10.1097/hjh.0000000000003094> PMID: 35185119.
23. Azizi F, Ghanbarian A, Momenan AA, Hadaegh F, Mirmiran P, Hedayati M, et al. Prevention of non-communicable disease in a population in nutrition transition: Tehran Lipid and Glucose Study phase II. *Trials*. 2009; 10(1):1–15. <https://doi.org/10.1186/1745-6215-10-5> PMID: 19166627
24. Azizi F, Rahmani M, Emami H, Mirmiran P, Hajipour R, Madjid M, et al. Cardiovascular risk factors in an Iranian urban population: Tehran lipid and glucose study (phase 1). *Sozial-und präventivmedizin*. 2002; 47(6):408–26. <https://doi.org/10.1007/s000380200008> PMID: 12643001
25. Khalili D, Azizi F, Asgari S, Zadeh-Vakili A, Momenan AA, Ghanbarian A, et al. Outcomes of a longitudinal population-based cohort study and pragmatic community trial: findings from 20 years of the Tehran Lipid and Glucose Study. *International journal of endocrinology and metabolism*. 2018; 16(4 Suppl). <https://doi.org/10.5812/ijem.84748> PMID: 30584434
26. Momenan AA, Delshad M, Sarbazi N, Rezaei Ghaleh N, Ghanbarian A, Azizi F. Reliability and validity of the Modifiable Activity Questionnaire (MAQ) in an Iranian urban adult population. *Arch Iran Med*. 2012; 15(5):279–82. Epub 2012/04/24. PMID: 22519376.
27. Thompson FE, Subar AF. Chapter 1—Dietary Assessment Methodology. In: Coulston AM, Boushey CJ, Ferruzzi MG, Delahanty LM, editors. *Nutrition in the Prevention and Treatment of Disease* ( Fourth Edition): Academic Press; 2017. p. 5–48.
28. Rezazadeh A, Omidvar N, Tucker KL. Food frequency questionnaires developed and validated in Iran: a systematic review. *Epidemiology and Health*. 2020;42. <https://doi.org/10.4178/epih.e2020015> PMID: 32229793
29. Delshad M, Ghanbarian A, Ghaleh NR, Amirshakeri G, Askari S, Azizi F. Reliability and validity of the modifiable activity questionnaire for an Iranian urban adolescent population. *Int J Prev Med*. 2015; 6:3. Epub 2015/03/20. <https://doi.org/10.4103/2008-7802.151433> PMID: 25789138; PubMed Central PMCID: PMC4362275.
30. Earley A, Miskulin D, Lamb EJ, Levey AS, Uhlig K. Estimating equations for glomerular filtration rate in the era of creatinine standardization: a systematic review. *Annals of internal medicine*. 2012; 156(11):785–95. <https://doi.org/10.7326/0003-4819-156-6-201203200-00391> PMID: 22312131
31. Rubin DB. Estimating causal effects from large data sets using propensity scores. *Annals of internal medicine*. 1997; 127(8\_Part\_2):757–63. [https://doi.org/10.7326/0003-4819-127-8\\_part\\_2-199710151-00064](https://doi.org/10.7326/0003-4819-127-8_part_2-199710151-00064) PMID: 9382394
32. Nelson RG, Grams ME, Ballew SH, Sang Y, Azizi F, Chadban SJ, et al. Development of risk prediction equations for incident chronic kidney disease. *Jama*. 2019; 322(21):2104–14. <https://doi.org/10.1001/jama.2019.17379> PMID: 31703124
33. Xia J, Wang L, Ma Z, Zhong L, Wang Y, Gao Y, et al. Cigarette smoking and chronic kidney disease in the general population: a systematic review and meta-analysis of prospective cohort studies. *Nephrology Dialysis Transplantation*. 2017; 32(3):475–87. <https://doi.org/10.1093/ndt/gfw452> PMID: 28339863

34. González-Ortiz A, Clase CM, Campbell KL, Xu H, Carrero J-J. Modifiable Lifestyle Factors for Primary Prevention of CKD: A Systematic Review and Meta-Analysis. *Journal of the American Society of Nephrology*. 2020. <https://doi.org/10.1681/ASN.2020030384> PMID: 32868398
35. Zhu Y, Bu Y, Zhang G, Ding S, Zhai D, Wan Z, et al. Association of physical activity with chronic kidney disease: a systematic review and dose-response meta-analysis. *Aging (Albany NY)*. 2020; 12(19):19221. <https://doi.org/10.18632/aging.103747> PMID: 33027768
36. Han QL, Wu SL, Liu XX, An SS, Wu YT, Gao JS, et al. Ideal cardiovascular health score and incident end-stage renal disease in a community-based longitudinal cohort study: the Kailuan Study. *BMJ Open*. 2016; 6(11):e012486. <https://doi.org/10.1136/bmjopen-2016-012486> PMID: 27899399
37. Liu X, Cui L, Wang A, Wang X, Song Q, Li S, et al. Cumulative exposure to ideal cardiovascular health and incident diabetes in a Chinese population: the Kailuan study. *Journal of the American Heart Association*. 2016; 5(9):e004132. <https://doi.org/10.1161/JAHA.116.004132> PMID: 27638783
38. Mirmiran P, Ramezan M, Farhadnejad H, Asghari G, Tahmasebinejad Z, Azizi F. High Dietary Diabetes Risk Reduction Score Is Associated with Decreased Risk of Chronic Kidney Disease in Tehranian Adults. *International Journal of Clinical Practice*. 2022;2022. <https://doi.org/10.1155/2022/5745297> PMID: 35685521
39. Hosseini-Esfahani F, Moslehi N, Asghari G, Hosseinpour-Niazi S, Bahadoran Z, Yuzbashian E, et al. Nutrition and diabetes, cardiovascular and chronic kidney diseases: findings from 20 years of the Tehran lipid and glucose study. *International journal of endocrinology and metabolism*. 2018; 16(4 (Suppl)). <https://doi.org/10.5812/ijem.84791> PMID: 30584447
40. Yuzbashian E, Asghari G, Mirmiran P, Zadeh-Vakili A, Azizi F. Sugar-sweetened beverage consumption and risk of incident chronic kidney disease: Tehran lipid and glucose study. *Nephrology*. 2016; 21(7):608–16. <https://doi.org/10.1111/nep.12646> PMID: 26439668
41. Farhadnejad H, Asghari G, Mirmiran P, Yuzbashian E, Azizi F. Micronutrient intakes and incidence of chronic kidney disease in adults: Tehran Lipid and Glucose Study. *Nutrients*. 2016; 8(4):217. <https://doi.org/10.3390/nu8040217> PMID: 27104561
42. Sasso FC, Carbonara O, Persico M, Iafusco D, Salvatore T, D'Ambrosio R, et al. Irbesartan reduces the albumin excretion rate in microalbuminuric type 2 diabetic patients independently of hypertension: a randomized double-blind placebo-controlled crossover study. *Diabetes Care*. 2002; 25(11):1909–13. <https://doi.org/10.2337/diacare.25.11.1909> PMID: 12401731
